# Supplementary material for: A serine protease extracted from Trichosanthes kirilowii induces apoptosis via the PI3K/AKT-mediated mitochondrial pathway in human colorectal adenocarcinoma cells
Source: Royal Society of Chemistry journal article supplement (doi:10.1039/c5fo00760g), 2015-12-08
Supplement: c5fo00760g1.pdf [file c5fo00760g1.pdf]

**Fig. S1 Effects of IGF-1 on TKP-mediated changes in apoptosis-related proteins in mitochondria pathway, cell viability and cell apoptosis.** After both DLD1 and HCT116 cells were pre-incubated with IGF-1 for 2 h and then treated with 20 µg/mL TKP for 24 h, the protein levels of p-AKT, AKT, cytochrome c, Bcl-2, Bax, caspase-9 and caspase-3 were detected by western blotting and  $\alpha$ -tubulin was used as the loading control; (B) cell viability was detected by MTT; (C and D) cell apoptosis and apoptosis ratio were assessed by flow cytometry; In (B) and (D), data represent mean  $\pm$  SD from three biologically independent experiments.  $**p < 0.01$  compared to cells treated with TKP alone.
